# Supplementary material for: Metavir and FIB-4 scores are associated with patient prognosis after curative hepatectomy in hepatitis B virus-related hepatocellular carcinoma: a retrospective cohort study at two centers in China
Source: PubMed Central journal article supplement (PMC5352096; doi:10.18632/oncotarget.12152), 2016-09-20
Supplement: oncotarget-08-1774-s001.pdf [file oncotarget-08-1774-s001.pdf]

---

**Metavir and FIB-4 scores are associated with patient prognosis after curative hepatectomy in hepatitis B virus-related hepatocellular carcinoma: a retrospective cohort study at two centers in China**

**Supplementary Materials**

**Table S1 The area under the receiver operating characteristic curve (AUROC) of Metavir score, FIB-4 and their combination**

---

| Characteristics |                       | AUROC (95% CI)            |                     |                              |                     |
|-----------------|-----------------------|---------------------------|---------------------|------------------------------|---------------------|
|                 |                       | Testing Cohort<br>(n=108) |                     | Validation Cohort<br>(n=324) |                     |
|                 |                       | RFS                       | OS                  | RFS                          | OS                  |
| Metavir score   | (F1-3/4)              | 0.652 (0.528-0.779)       | 0.618 (0.496-0.740) | 0.550 (0.499-0.624)          | 0.560(0.492-0.628)  |
| FIB-4           | ( I /II)              | 0.670 (0.548-0.792)       | 0.635 (0.515-0.755) | 0.550 (0.487-0.612)          | 0.563 (0.494-0.632) |
| Combined M+F    | both low<br>both high | 0.708 (0.596-0.820)       | 0.669 (0.550-0.789) | 0.573 (0.511-0.635)          | 0.583 (0.516-0.650) |

---

Abbreviations: RFS: recurrence-free survival; OS: overall survival.

---

**Table S2 Correlation between FIB-4 and other non-invasive markers**

---

| Parameters  |            | FIB-4 ( $\leq 3.25$ vs $> 3.25$ ) |       |              |                              |       |              |
|-------------|------------|-----------------------------------|-------|--------------|------------------------------|-------|--------------|
|             |            | Testing Cohort<br>(n=108)         |       |              | Validation Cohort<br>(n=324) |       |              |
|             |            | n                                 | r     | p            | n                            | r     | P            |
| Forns index | $\leq 6.9$ | 65                                | 0.581 | <b>0.017</b> | 213                          | 0.325 | <b>0.024</b> |
|             | $> 6.9$    | 43                                |       |              | 111                          |       |              |
| APRI        | $\leq 1.5$ | 55                                | 0.313 | <b>0.002</b> | 204                          | 0.216 | <b>0.017</b> |
|             | $> 1.5$    | 53                                |       |              | 120                          |       |              |
| GPS         | 0          | 69                                | 0.216 | 0.059        | 198                          | 0.192 | 0.127        |
|             | 1/2        | 39                                |       |              | 126                          |       |              |
| PI          | 0          | 61                                | 0.192 | 0.173        | 189                          | 0.257 | 0.335        |
|             | 1/2        | 47                                |       |              | 135                          |       |              |
| PNI         | 0          | 71                                | 0.201 | 0.097        | 204                          | 0.362 | 0.213        |
|             | 1          | 37                                |       |              | 120                          |       |              |

---

Abbreviations: APRI: aspartate aminotransferase to platelet ratio index; GPS: Glasgow prognostic score; PI: prognostic index; PNI: prognostic nutritional index.

**Figure S1**

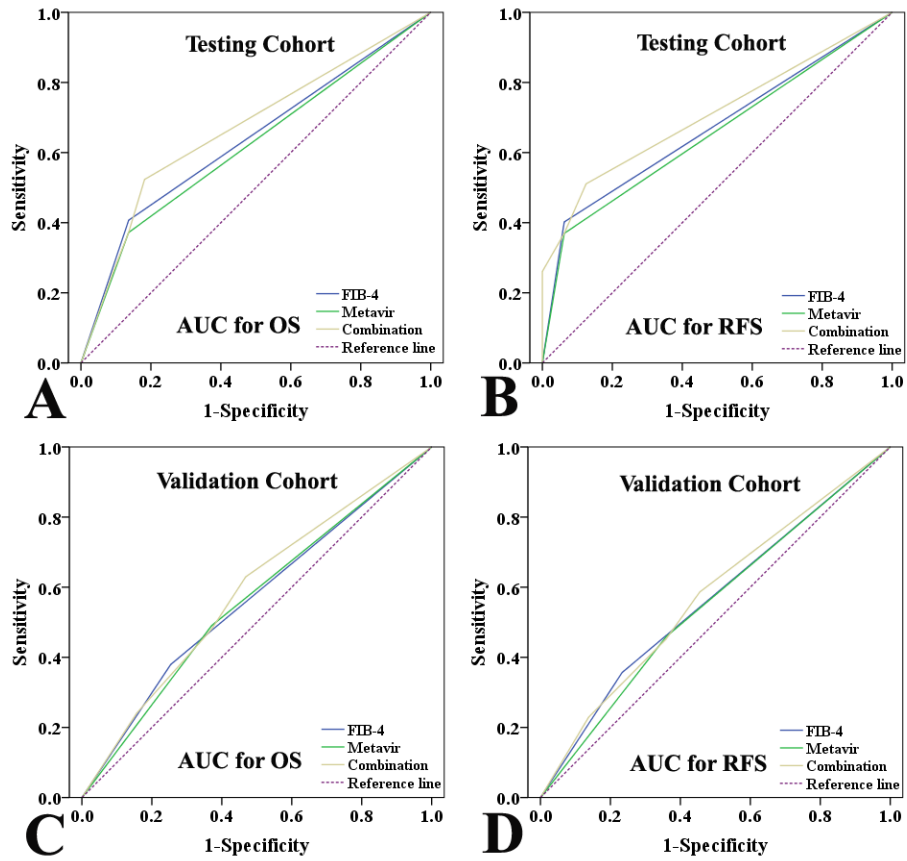

**Figure S1.** Receiver operating characteristics (ROC) curves of the predictive ability of the FIB-4, Metavir, and combined FIB-4 and Metavir scores in the testing (A and B) and validation sets (C and D).

**Figure S2**

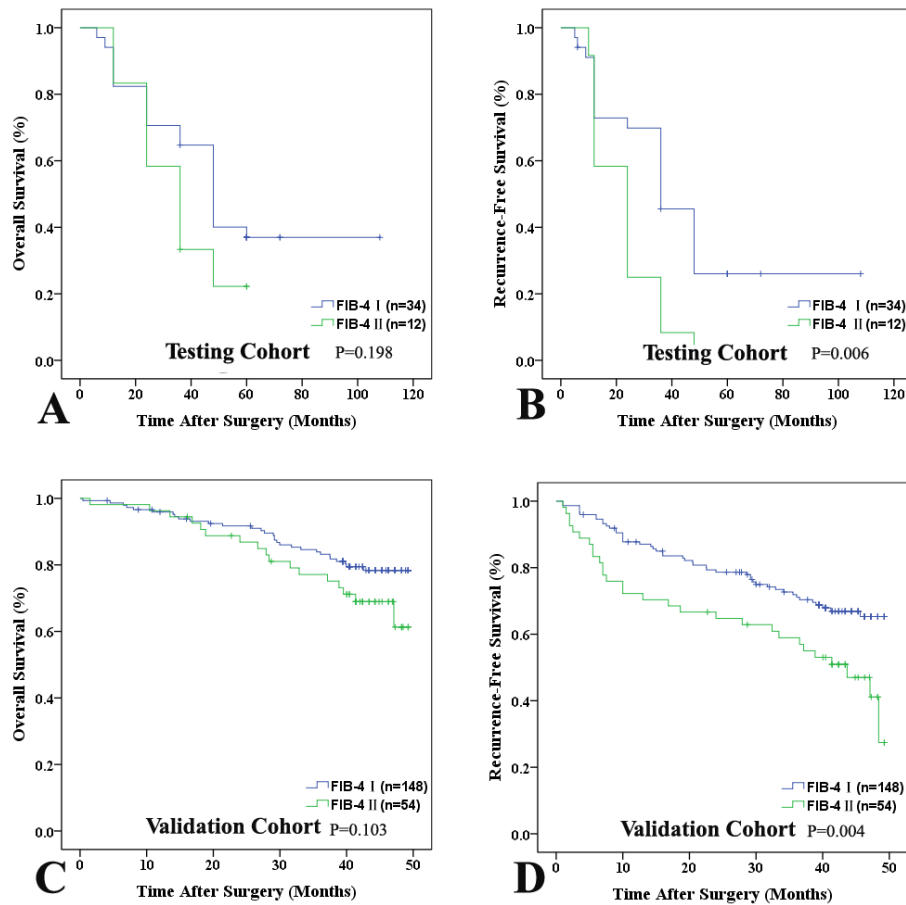

**Figure S2. Kaplan-Meier analyses of FIB-4 index in patients with early stage HCC (TNM I and II) without vascular invasion. The FIB-4 index could predict RFS (C and D) and OS (A and B) in the testing (A and B) and validation (C and D) sets.**
